# Supplementary material for: An atomically thin layer of Ru/MoS2heterostructure: structural, electronic, and magnetic properties
Source: Royal Society of Chemistry journal article supplement (doi:10.1039/c6cp06905c), 2016-01-01
Supplement: c6cp06905c1.pdf [file c6cp06905c1.pdf]

(Supplementary Information)

## Atomic-thin layer of Ru/MoS<sub>2</sub> heterostructure: structural, electronic, and magnetic properties

Chenghuan Jiang,<sup>a</sup> Rongqin Zhou,<sup>b</sup> Zhaohui Peng,<sup>b</sup> Jinfu Zhu<sup>a</sup> and Qian Chen<sup>\*b</sup>

<sup>a</sup> Institute of Communication and Technology, Communication University, Nanjing 211172, China

<sup>b</sup> Department of Physics, Southeast University, Nanjing 211189, China

\*Corresponding Author Email: qc119@seu.edu.cn.

1. The atomic structures of 4×4 supercell for single and 5×5 supercell for double and trifoliate Ru atoms adsorbed on MoS<sub>2</sub>. A 3×3×1 k-mesh based on gamma-centred scheme is applied for relaxation calculations and a gamma-centred 7×7×1 grid for static calculations.

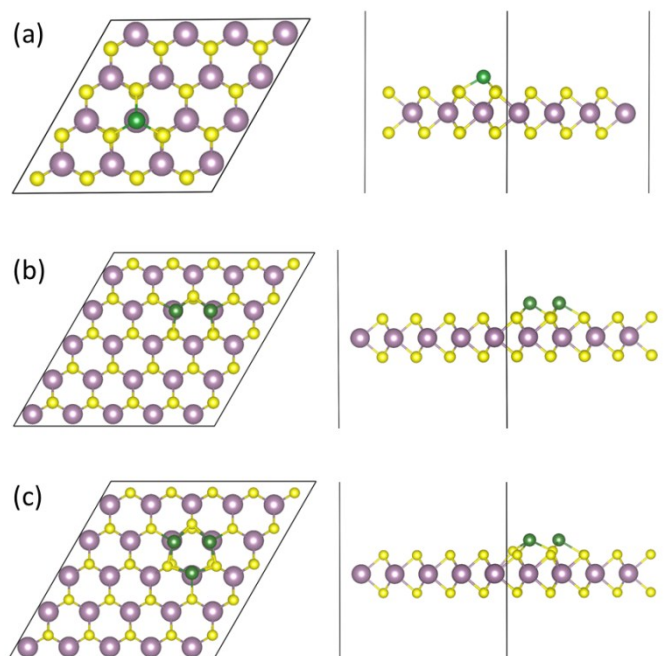

Fig. S1. The atomic structures of 4×4 supercell for single and 5×5 supercell for double and trifoliate Ru atoms adsorbed on MoS<sub>2</sub>.

2. The lattice relaxation has been applied for the fully covered Ru/MoS<sub>2</sub> system, as shown in Fig. S2a. The optimized lattice constant is 3.22 Å, which is larger than 3.18 Å of pure MoS<sub>2</sub>. Here, a 5×5×1 k-mesh based on gamma-centred scheme is applied for relaxation calculations of 2×2 supercell. A 4×4 supercell for single Ru adsorption configurations is also relaxed and the lattice constant is ~3.18 Å (see Fig. S2b).

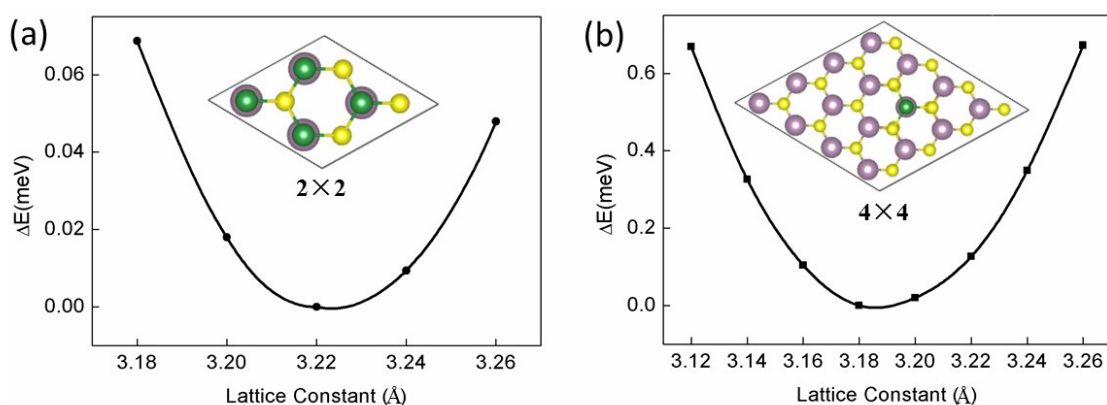

Fig. S2. The fitted line of total energy versus lattice constants, the units of lattice constants are given in angstroms.

3. A 6×6 supercell of Ru/MoS<sub>2</sub> layer has been constructed to calculate the FM and AFM coupling states, as shown in Fig. S3. The energy difference ( $\Delta E_{\text{AFM-FM}}$ ) is 173 meV, which has verified the accuracy of the result ( $\Delta E_{\text{AFM-FM}} = 171$  meV) obtained from a 2×2 supercell.

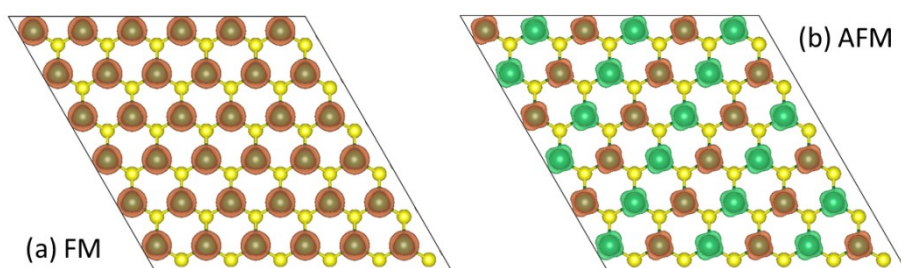

Fig. S3. Spin density of a 6×6 Ru/MoS<sub>2</sub> layer with FM (a) and AFM (b) coupling, the iso-value is 0.008 e/Å<sup>3</sup>.
